# Supplementary material
Source: PubMed Central journal article supplement (PMC3712508)

**A**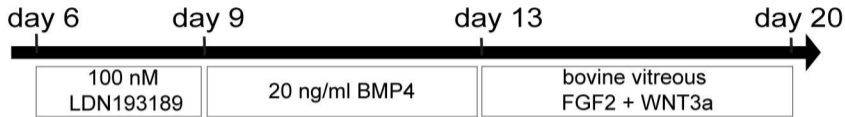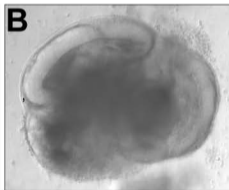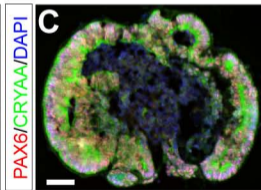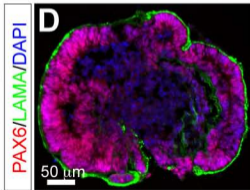**E**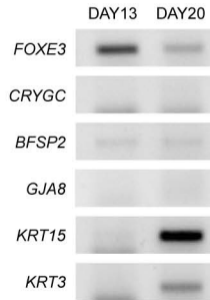

Supplement: NIHMS474589-supplement-01.pdf [file NIHMS474589-supplement-01.pdf]
